# Supplementary material
Source: PubMed Central journal article supplement (PMC4142219)
Supplement: NIHMS549161-supplement-2_si_001.pdf [file NIHMS549161-supplement-2_si_001.pdf]

**Characterization of glycoproteins in pancreatic cyst fluid using a high performance multiple lectin affinity chromatography platform**

Francisca O. Gbormittah<sup>1</sup>, Brian B. Haab<sup>2</sup>, Katie Partyka<sup>2</sup>, Carolina Garcia-Ott<sup>1</sup>, Marina Hancapie<sup>3</sup>, William S. Hancock<sup>1\*</sup>

<sup>1</sup> Barnett Institute and Department of Chemistry and Chemical Biology, Northeastern University, 360 Huntington Avenue, Boston, MA 02115, USA

<sup>2</sup> Centers for Cancer Genomics and Quantitative Biology, Van Andel Research Institute, Grand Rapids, Michigan 49503, USA

<sup>3</sup> Genzyme, a Sanofi Company, 45 New York Avenue, Framingham, MA. 01701

**Supplementary Figure 1.** Workflow diagram showing experimental process used in glycoproteomic studies of two analysis sample set. Pancreatic cyst fluid samples were purified from immunoglobulins (A, D, E, G, M, and light chains) and albumin using an immobilized antibody HPLC packed PEEK column. Glycoprotein enrichment followed by one dimensional gel electrophoresis were used as further fractionation steps leading to nano-LC-MS/MS analysis of M-LAC bound and unbound fractions.

**Supplementary Figure 2.** 1D SDS-PAGE of two sample sets used for glycoproteomics analysis. Variations in albumin levels and individual differences in each sample set accounts for variability in proteins identified in sample set one compared to sample set two.

**Supplementary Figure 3.** MS/MS fragmentation of diagnostic peptide TYAYLFSHPSR of CEL-long isoform. Sequence coverage is 13.95, Charge: +2, Monoisotopic m/z: 671.333 Da (accuracy: +0.05 mmu/+0.08 ppm), ionscore: 44

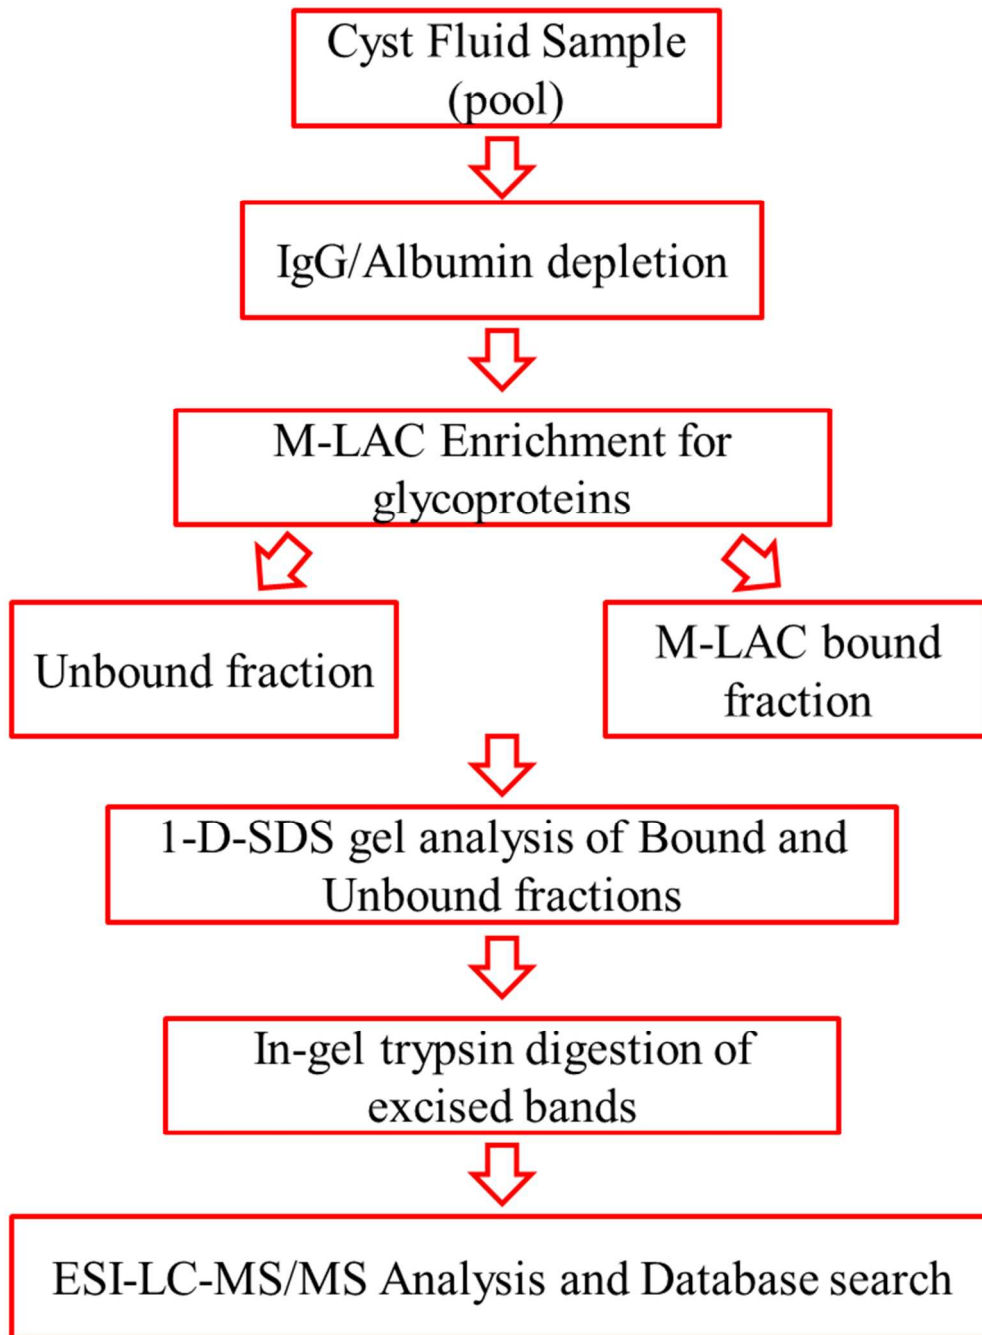

Figure 1

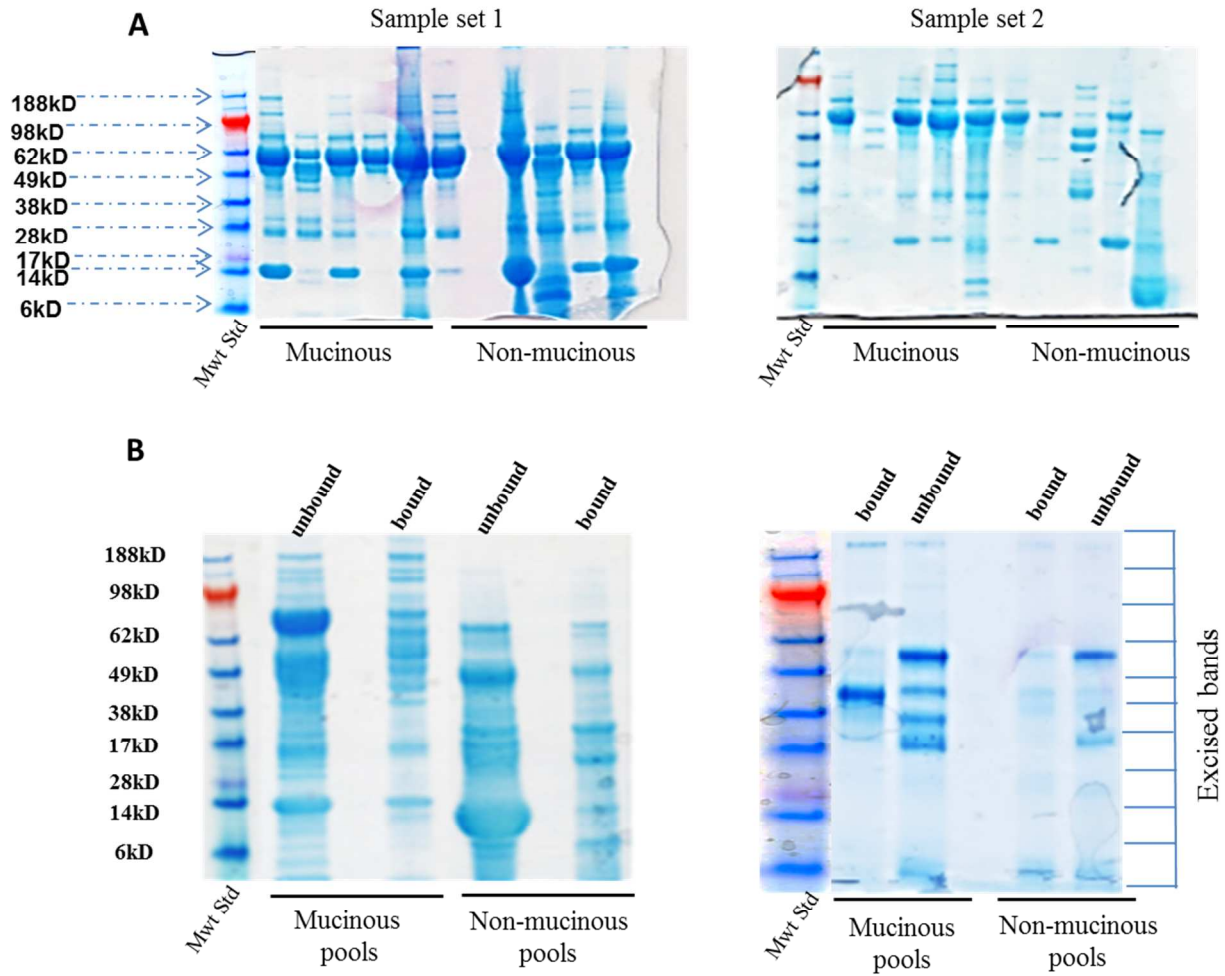

**Figure 2**

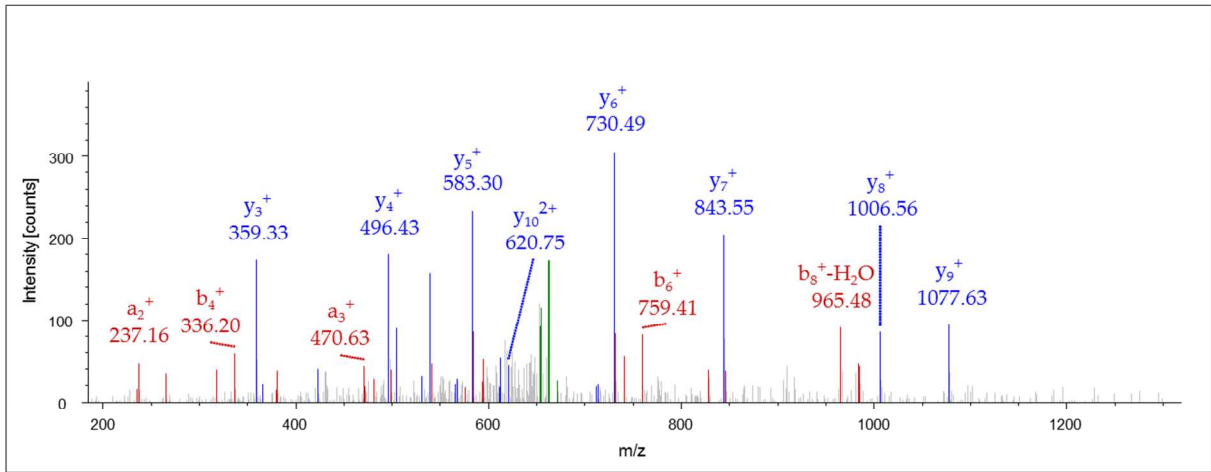

**Figure 3**

Supplementary table 1. Number of Identified proteins in the Unbound and M-LAC Bound fractions after 1D SDS-PAGE LC-MS/MS Glycoproteomics analysis

| Sample set 1        | Number of unbound proteins |                    |                | Number of bound proteins |                    |                | Ratio<br>(BD/UNBD)x100 |
|---------------------|----------------------------|--------------------|----------------|--------------------------|--------------------|----------------|------------------------|
|                     | Spectral count = 1*        | Spectral count ≥ 2 | Total proteins | Spectral count = 1*      | Spectral count ≥ 2 | Total proteins |                        |
| <b>Pools</b>        |                            |                    |                |                          |                    |                |                        |
| <b>Mucinous</b>     | 146                        | 223                | 369            | 134                      | 160                | 294            | 79.7                   |
| <b>Non-mucinous</b> | 142                        | 290                | 432            | 99                       | 184                | 283            | 65.5                   |

| Sample set 2        | Number of unbound proteins |                    |                | Number of bound proteins |                    |                | Ratio<br>(BD/UNBD)x100 |
|---------------------|----------------------------|--------------------|----------------|--------------------------|--------------------|----------------|------------------------|
|                     | Spectral count = 1*        | Spectral count ≥ 2 | Total proteins | Spectral count = 1*      | Spectral count ≥ 2 | Total proteins |                        |
| <b>Pools</b>        |                            |                    |                |                          |                    |                |                        |
| <b>Mucinous</b>     | 93                         | 170                | 263            | 80                       | 110                | 190            | 72.2                   |
| <b>Non-mucinous</b> | 71                         | 120                | 191            | 44                       | 82                 | 126            | 66                     |

\*Proteins with spectral count equal to one were included in data analysis if the proteins were found with high abundance (spectral count > 10) in one sample set.

Supplementary table 2A. Identified peptides for bile salt-activated lipase (CEL) long iso-form in M-LAC bound subproteome. Protein sequence coverage is 16.5%.

| Sequence                | Charge | MH+ [Da] | Intensity | RT [min] |
|-------------------------|--------|----------|-----------|----------|
| ALENPQPHPGWQGTLK        | 3      | 1772.909 | 6.82E+06  | 44.14    |
| DQHmAIAWVK              | 3      | 1214.598 | 1.59E+06  | 43.39    |
| GIPFAAPTK               | 1      | 901.514  | 6.70E+06  | 45.44    |
| KLGLLGDSVDIFK           | 3      | 1404.809 | 4.19E+05  | 63.46    |
| LGAVYTEGGFVEGVNKK       | 2      | 1767.927 | 1.94E+06  | 48.20    |
| NPLFWAK                 | 2      | 875.478  | 6.99E+06  | 54.32    |
| TVVDFETDVLFLVPTEIALAQHR | 3      | 2613.397 | 2.59E+05  | 89.59    |
| TYAYLFSHPSR             | 3      | 1341.660 | 2.68E+06  | 48.32    |
| VGCPVGDAAR              | 2      | 1001.482 | 8.43E+06  | 26.56    |
| VTEEDFYK                | 2      | 1030.472 | 2.22E+06  | 39.50    |
| AISQSGVALSPWVIQK        | 2      | 1683.945 | 5.78E+05  | 61.88    |
| LGLLGDSVDIFK            | 2      | 1276.716 | 2.04E+06  | 70.57    |
| VGPLGFLSTGDANLPGNYGLR   | 2      | 2118.103 | 1.11E+05  | 70.91    |

Blue highlight is showing diagnostic peptide sequence unique to bile salt-activated lipase long iso-form.

Supplementary table **2B**. Identified peptides for bile salt-activated lipase (CEL) short iso-form in unbound subproteome. Protein sequence coverage is 13.97%.

| <b>Sequence</b>         | <b>Charge</b> | <b>MH+ [Da]</b> | <b>Intensity</b> | <b>RT [min]</b> |
|-------------------------|---------------|-----------------|------------------|-----------------|
| AISQSGVALSPWVIQK        | 2             | 1683.943        | 2.60E+06         | 60.54           |
| ATLAYK                  | 1             | 779.466         | 2.66E+06         | 45.25           |
| LGLLGDSVDIFK            | 2             | 1276.715        | 4.94E+06         | 69.1            |
| NPLFWAK                 | 2             | 875.477         | 2.00E+06         | 55.85           |
| TVVDFETDVLFLVPTEIALAQHR | 3             | 2613.392        | 7.20E+05         | 88.57           |
| VGCPVGDAAR              | 2             | 1001.483        | 3.19E+06         | 31.79           |
| VGPLGFLSTGDANLPGNYGLR   | 2             | 2118.099        | 1.94E+06         | 70.58           |



Supplementary table 3. Novoseek disease relationship to pancreatic cancer and related diseases data of selected protein target list

| <b>Protein Name</b>                                                  | <b>Gene Name</b> | <b>Disease association</b>       |
|----------------------------------------------------------------------|------------------|----------------------------------|
| 14-3-3 protein epsilon                                               | YWHAE            | -                                |
| 14-3-3 protein zeta/delta                                            | YWHAZ            | -                                |
| Adenylyl cyclase-associated protein 1                                | CAP1             | Pancreatic Cancer                |
| Adenylyl cyclase-associated protein 1                                | CAP1             | pancreatitis                     |
| Aldo-keto reductase family 1 member B10                              | AKR1B10          | -                                |
| Alpha-1-acid glycoprotein 2                                          | ORM2             | -                                |
| Alpha-2-HS-glycoprotein                                              | AHSG             | -                                |
| Alpha-amylase 2B                                                     | AMY2B            | pancreatitis                     |
| Annexin A10                                                          | ANXA10           | -                                |
| Annexin A5                                                           | ANXA5            | pancreatitis                     |
| Annexin A5                                                           | ANXA5            | Pancreatic Ductal Adenocarcinoma |
| Annexin A5                                                           | ANXA5            | pancreatic carcinoma             |
| Annexin A5                                                           | ANXA5            | pancreatic cancer                |
| Aspartate aminotransferase, mitochondrial                            | GOT2             | -                                |
| Basement membrane-specific heparan sulfate proteoglycan core protein | HSPG2            | -                                |
| Bifunctional purine biosynthesis protein PURH                        | ATIC             | -                                |
| Bile salt-activated lipase                                           | CEL              | pancreas exocrine                |
| Bile salt-activated lipase                                           | CEL              | pancreatic tumor                 |
| Bile salt-activated lipase                                           | CEL              | pancreatitis                     |
| Bile salt-activated lipase                                           | CEL              | pancreatic cancer                |
| Cadherin-17                                                          | CDH17            | pancreatitis                     |
| Calcium-activated chloride channel regulator 1                       | CLCA1            | pancreatitis                     |
| Carbonic anhydrase 1                                                 | CA1              | chronic pancreatitis             |
| Carbonic anhydrase 2                                                 | CA2              | chronic pancreatitis             |
| Carboxypeptidase A1                                                  | CPA1             | Pancreatitis                     |
| Carboxypeptidase A2                                                  | CPA2             | pancreatitis                     |
| Carboxypeptidase B                                                   | CPB1             | pancreatitis alcoholic           |
| Carboxypeptidase B                                                   | CPB1             | acute pancreatitis               |
| Carboxypeptidase B                                                   | CPB1             | pancreatitis                     |
| Carboxypeptidase B                                                   | CPB1             | pancreatic cancer                |
| Catalase                                                             | CAT              | -                                |
| Fibronectin                                                          | FN1              | -                                |
| Glutathione S-transferase A1                                         | GSTA1            | -                                |
| Glutathione S-transferase A2                                         | GSTA2            | -                                |

Supplementary table 3 conti.

| <b>Protein Name</b>                       | <b>Gene Name</b> | <b>Disease association</b>        |
|-------------------------------------------|------------------|-----------------------------------|
| Glycine amidinotransferase, mitochondrial | GATM             | pancreatitis                      |
| Heat shock 70 kDa protein 1A/1B           | HSPA1A           | -                                 |
| Heat shock 70 kDa protein 1-like          | HSPA1L           | -                                 |
| Heat shock 70 kDa protein 6               | HSPA6            | -                                 |
| Heat shock cognate 71 kDa protein         | HSPA8            | -                                 |
| Hexokinase-1                              | HK1              | Pancreatic Cancer                 |
| Hexokinase-1                              | HK1              | pancreatitis                      |
| Histone H4                                | HIST1H4I         | -                                 |
| Interstitial collagenase                  | MMP1             | -                                 |
| Isoform H14 of Myeloperoxidase            | MPO              | -                                 |
| Kininogen-1                               | KNG1             | pancreatitis                      |
| Leucine-rich alpha-2-glycoprotein         | LRG1             | Pancreatitis                      |
| Leukotriene A-4 hydrolase                 | LTA4H            | -                                 |
| Metalloproteinase inhibitor 1             | TIMP1            | -                                 |
| Mucin-2                                   | MUC2             | pancreatic tumor                  |
| Mucin-2                                   | MUC2             | pancreatic cancer                 |
| Mucin-2                                   | MUC2             | carcinoma pancreatic ductal       |
| Mucin-2                                   | MUC2             | pancreatic carcinoma              |
| Mucin-2                                   | MUC2             | chronic pancreatitis              |
| Mucin-2                                   | MUC2             | pancreatic cystadenoma mucinous   |
| Mucin-6                                   | MUC6             | pancreatic tumor                  |
| Mucin-6                                   | MUC6             | chronic pancreatitis              |
| Mucin-6                                   | MUC6             | carcinoma pancreatic ductal       |
| Pancreatic alpha-amylase                  | AMY2A            | pancreatitis                      |
| Pancreatic lipase-related protein 2       | PNLIPRP2         | pancreatitis                      |
| Pancreatic triacylglycerol lipase         | PNLIP            | pancreatic insufficiency          |
| Pancreatic triacylglycerol lipase         | PNLIP            | exocrine pancreatic insufficiency |
| Pancreatic triacylglycerol lipase         | PNLIP            | pancreas exocrine                 |
| Pancreatic triacylglycerol lipase         | PNLIP            | pancreatic diseases               |
| Pancreatic triacylglycerol lipase         | PNLIP            | acute pancreatitis                |
| Pancreatic triacylglycerol lipase         | PNLIP            | chronic pancreatitis              |
| Pancreatic triacylglycerol lipase         | PNLIP            | pancreatitis                      |
| Pancreatic triacylglycerol lipase         | PNLIP            | pancreatic cancer                 |

Supplementary table 3 conti.

| <b>Protein Name</b>                | <b>Gene Name</b> | <b>Disease association</b>       |
|------------------------------------|------------------|----------------------------------|
| Periostin                          | POSTN            | Pancreatic Ductal Adenocarcinoma |
| Periostin                          | POSTN            | Pancreatitis                     |
| Periostin                          | POSTN            | Pancreatic cancer                |
| Phosphoglycerate kinase 1          | PGK1             | -                                |
| Pigment epithelium-derived factor  | SERPINF1         | -                                |
| Protein disulfide-isomerase A4     | PDIA4            | -                                |
| Protein S100-A12                   | S100A12          | -                                |
| Puromycin-sensitive aminopeptidase | NPEPPS           | -                                |
| Pyruvate kinase isozymes M1/M2     | PKM              | pancreatitis                     |
| Pyruvate kinase isozymes M1/M2     | PKM              | pancreatic cancer                |
| Tetranectin                        | CLEC3B           | -                                |
| Vinculin                           | VCL              | -                                |
| Vitamin D-binding protein          | GC               | -                                |

(-) 'proteins of interest' in which no disease association was found using Novoseek data mining tool.
